# Supplementary material
Source: MDPI journal article supplement (https://www.mdpi.com/search?q=jcm-09-00461)
Supplement: s001 [file jcm-09-00461-s001.pdf]

## Supplementary Material

# Body Weight as a Determining Factor in the Predominance of Adverse Drug Reactions Induced by Fixed-Dose Adalimumab Injections in Female Patients in a Korean Hospital Setting

Kwi Suk Kim <sup>1</sup>, Young Hee Choi <sup>2</sup>, Aree Moon <sup>3</sup> and Sang Geon Kim <sup>1,4,\*</sup>

<sup>1</sup> Department of Pharmacy, Seoul National University Hospital, Seoul 03080, Korea; ag0902@hanmail.net

<sup>2</sup> College of Pharmacy, Dongguk University Seoul, Goyang-si, Gyeonggi-do 10326, Korea; choiyh@dongguk.edu

<sup>3</sup> Duksung Innovative Drug Center, College of Pharmacy, Duksung Women's University, Seoul 01369, Korea; armoon@duksung.ac.kr

<sup>4</sup> College of Pharmacy and Research Institute of Pharmaceutical Sciences, Seoul National University, 1 Gwanak-ro, Gwanak-gu, Seoul 08826, Korea

\* Correspondence: sgk@snu.ac.kr; Tel.: +82-2-880-7840

**Table 1.** Demographic characteristics of all patients administered adalimumab.

| Total (n = 727)                        | Male (n = 446)          | Female (n = 281) | p - values |
|----------------------------------------|-------------------------|------------------|------------|
| Age [Median, (min-max)]*               | 34.5 (19–78)            | 46 (19–84)       | p < 0.001  |
| Effect [n, (%)]                        |                         |                  |            |
| Yes                                    | 394 (88.3%)             | 235 (83.6%)      | p = 0.120  |
| No                                     | 45 (10.1%)              | 38 (13.5%)       | p = 0.052  |
| Non-Judgment                           | 7 (1.6%)                | 8 (2.9%)         | p = 0.238  |
| Number of Patients with ADRs [n, (%)]* | 227 (50.9%)             | 171 (60.9%)      | p < 0.001  |
| Number of ADRs [n]                     | 352                     | 290              |            |
| ADR per Patient*                       | 1.6                     | 1.7              | p = 0.044  |
| Sub-Grouped by Diagnosis               |                         |                  |            |
| 1) A                                   |                         |                  |            |
| Total (n = 320)                        | Male (n = 262)          | Female (n = 58)  |            |
| Age [Median, (min-max)]*               | 33 (19–78) <sup>a</sup> | 58 (19–67)       | p = 0.038  |
| Effect [n, (%)]                        | 238 (90.8%)             | 53 (91.4%)       | p = 0.897  |
| Number of Patients with ADRs [n, (%)]* | 148 (56.5%)             | 42 (72.4%)       | p < 0.001  |
| Number of ADRs [n]                     | 229                     | 85               |            |
| ADR Cases per Patient*                 | 1.5                     | 2.0              | p = 0.002  |
| 2) R                                   |                         |                  |            |
| Total (n = 172)                        | Male (n = 46)           | Female (n = 126) |            |
| Age [Median, (min-max)]                | 36 (19–78)              | 52 (19–84)       | p = 0.158  |
| Effect [n, (%)]                        | 39 (84.8%)              | 98 (77.8%)       | p = 0.312  |
| Number of Patients with ADRs [n, (%)]* | 22 (47.8%)              | 76 (60.3%)       | p < 0.001  |
| Number of ADRs [n]                     | 40                      | 112              |            |
| ADR Cases per Patient                  | 1.8                     | 1.5              | p = 0.102  |
| 3) B + C                               |                         |                  |            |
| Total (n = 167)                        | Male (n = 105)          | Female (n = 62)  |            |

|                                            |                   |                     |             |
|--------------------------------------------|-------------------|---------------------|-------------|
| Age [Median, (min-max)]                    | 36 (19–71)        | 36.5 (19–75)        | $p = 0.061$ |
| Effect [ $n$ , (%)]                        | 87 (82.9%)        | 53 (86.9%)          | $P = 0.656$ |
| Number of Patients with ADRs [ $n$ , (%)]* | 41 (39.0%)        | 32 (52.5%)          | $p < 0.001$ |
| Number of ADRs [ $n$ ]                     | 59                | 58                  |             |
| ADR Cases per Patient                      | 1.4               | 1.8                 | $p = 0.229$ |
| 4) P                                       |                   |                     |             |
| Total ( $n = 31$ )                         | Male ( $n = 18$ ) | Female ( $n = 13$ ) |             |
| Age [Median, (min-max)]                    | 38 (25–67)        | 54 (26–64)          | $p = 0.309$ |
| Effect [ $n$ , (%)]                        | 16 (88.9%)        | 12 (92.3%)          | $p = 0.751$ |
| Number of Patient with ADRs [ $n$ , (%)]*  | 9 (50.0%)         | 10 (76.9%)          | $p < 0.001$ |
| Number of ADRs [ $n$ ]                     | 13                | 18                  |             |
| ADR Cases per Patient                      | 1.4               | 1.8                 | $p = 0.220$ |
| 5) Comorbid Disease                        |                   |                     |             |
| Total ( $n = 22$ )                         | Male ( $n = 10$ ) | Female ( $n = 12$ ) |             |
| Age [Median, (min-max)]                    | 47 (19–60)        | 38 (19–71)          | $p = 0.527$ |
| Effect [ $n$ , (%)]                        | 9 (90.0%)         | 10 (83.3%)          | $p = 0.650$ |
| Number of Patients with ADRs [ $n$ , (%)]* | 7 (70.0%)         | 8 (66.7%)           | $p < 0.001$ |
| Number of ADRs [ $n$ ]                     | 11                | 12                  |             |
| ADR Cases per Patient                      | 1.6               | 1.5                 | $p = 0.678$ |
| 6) E                                       |                   |                     |             |
| Total ( $n = 15$ )                         | Male ( $n = 5$ )  | Female ( $n = 10$ ) |             |
| Age [Median, (min-max)]                    | 36 (23–48)        | 37.5 (19–71)        | $p = 0.285$ |
| Effect [ $n$ , (%)]                        | 5 (100.0%)        | 9 (90.0%)           | $p = 0.464$ |
| Number of Patients with ADRs [ $n$ , (%)]* | 0 (0.0%)          | 3 (30.0%)           | $p < 0.001$ |
| Number of ADRs [ $n$ ]                     | 0                 | 4                   |             |
| ADR Cases per Patient                      | 0.0               | 1.3                 | $p = 0.392$ |

Abbreviations; A, Ankylosing spondylitis; B, Bechet's disease; C, Crohn's disease; P, Psoriasis; R, Rheumatoid arthritis; Complex, two or more diseases; and E, others

ADR cases per patient were calculated by counting ADR incidences divided by number of patients with ADR.

\* Items marked are statistically significant between males and females.

**Table S2.** Effectiveness and ADR incidences in male or female patients sub-grouped by 50 percentile

|                                                                   | <b>Males</b>      | <b>Females</b>   | <b><i>p</i> - values</b> |
|-------------------------------------------------------------------|-------------------|------------------|--------------------------|
| <b>Total (<i>n</i> = 461)</b>                                     |                   |                  |                          |
| <b>Subgrouped by Percentiles of Patients in Each Gender</b>       |                   |                  |                          |
| <b>Patients with High 50 Percentile BW (<i>n</i> = 230)</b>       |                   |                  |                          |
| Number of Patients [ <i>n</i> , (%)]                              | 134 (58.3%)       | 96 (41.7%)       |                          |
| Age [Median, (min-max)]*                                          | 35 (19–74)        | 50.5 (19–84)     | <i>p</i> = 0.036         |
| Body Weight [Median, (min-max)]*                                  | 75.3 (66.0–120.0) | 59.8 (54.0–80.0) | <i>p</i> = 0.017         |
| Effect, Yes [ <i>n</i> , (%)]                                     | 117 (87.3%)       | 79 (82.3%)       | <i>p</i> = 0.290         |
| Number of Patients with ADRs [ <i>n</i> , (%)]                    | 67 (50.0%)        | 56 (58.3%)       | <i>p</i> = 0.211         |
| ADR Cases Per Patient<br>(Incidences/Number of Patients with ADR) | 1.6               | 1.7              | <i>p</i> = 0.508         |
| <b>Patients with Low 50 Percentile BW (<i>n</i> = 231)</b>        |                   |                  |                          |
| Number of Patients [ <i>n</i> , (%)]                              | 134 (58.0%)       | 97 (42.0%)       |                          |
| Age [Median, (min-max)]*                                          | 36 (19–78)        | 43 (19–79)       | <i>p</i> = 0.010         |
| Body Weight [Median, (min-max)]*                                  | 59.0 (36.8–66.0)  | 49.0 (31.7–53.9) | <i>p</i> = 0.007         |
| Effect, Yes [ <i>n</i> , (%)]                                     | 116 (86.6%)       | 78 (80.4%)       | <i>p</i> = 0.208         |
| Number of Patients with ADRs [ <i>n</i> , (%)]*                   | 73 (54.5%)        | 66 (68.0%)       | <i>p</i> = 0.038         |
| ADR Cases per Patient<br>(Incidences/Number of Patients with ADR) | 1.6               | 1.6              | <i>p</i> = 0.317         |

\*Items marked are statistically significant for gender differences.
